# Supplementary material for: UV-light aided photoelectrochemical synthesis of Au/TiO2 NTs for photoelectrocatalytic degradation of HPAM
Source: Royal Society of Chemistry journal article supplement (doi:10.1039/c6ra12031h), 2016-01-01
Supplement: c6ra12031h1.pdf [file c6ra12031h1.pdf]

## Supporting Information

### UV-light Aided Photoelectrochemical Synthesis of Au/TiO<sub>2</sub> NTs for

#### Photoelectrocatalytic Degradation of HPAM

Di Gu, Yang Wang, Zhida Li, Yue Liu, Baohui Wang and  
Hongjun Wu\*

*Provincial Key Laboratory of Oil&Gas Chemical Technology, College of  
Chemistry & Chemical Engineering, Northeast Petroleum University,  
Daqing 163318, China. E-mail: hjwu@nepu.edu.cn.*

#### 1. Degradation rate of HPAM using Au/TiO<sub>2</sub> NTs with different conditions

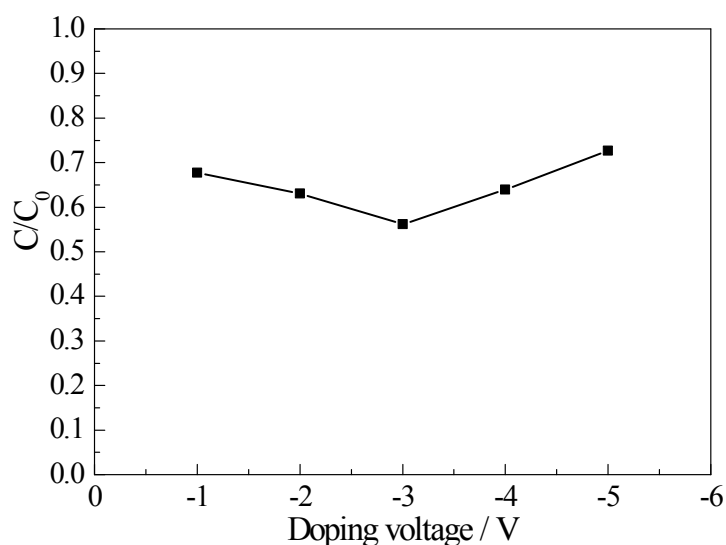

**Fig. S1** Degradation rate of HPAM using Au/TiO<sub>2</sub> NTs with different  
doping voltage

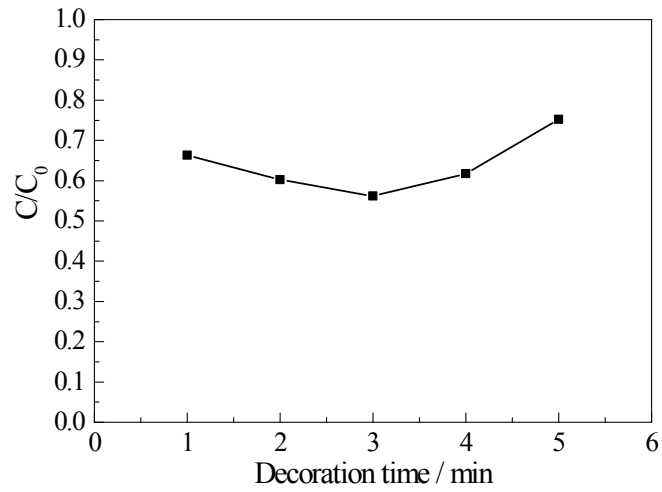

**Fig. S2** Degradation rate of HPAM using Au/TiO<sub>2</sub> NTs with different decoration time

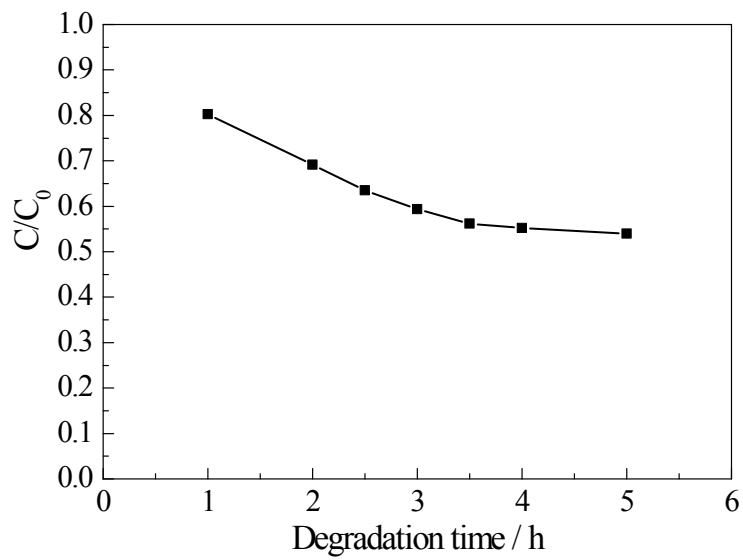

**Fig. S3** Degradation rate of HPAM using Au/TiO<sub>2</sub> NTs with different degradation time

**2. XPS of Au/TiO<sub>2</sub> NTs immersed with different concentrations of H<sub>2</sub>AuCl<sub>4</sub>**

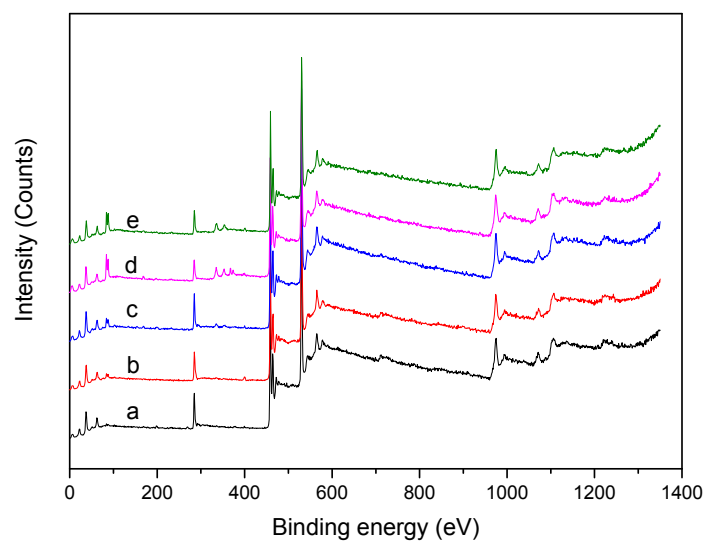

**Fig. S4** XPS of Au/TiO<sub>2</sub> NTs immersed with different concentrations of HAuCl<sub>4</sub>: curve a to e response to the concentrations of HAuCl<sub>4</sub> 0.005 g L<sup>-1</sup> to 0.025 g L<sup>-1</sup>.

### 3. The photocurrent response of TiO<sub>2</sub> NTs

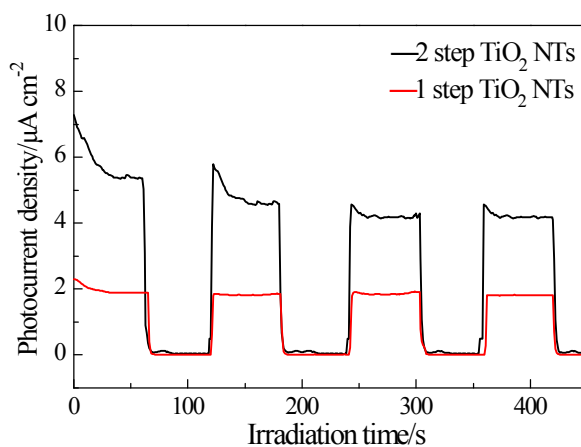

**Fig. S5** Amperometric I-t curves at an applied potential of 0.5V under illumination of 300 W high pressure mercury lamp with 60 s light on/off cycles.

### 4. Product analysis of the HPAM degradation

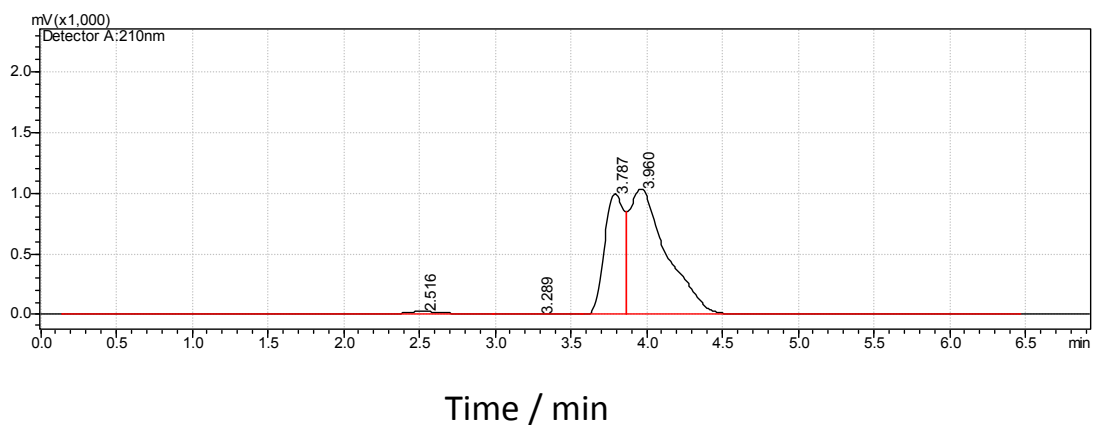

**Fig. S6** HPLC of acrylamide standard sample

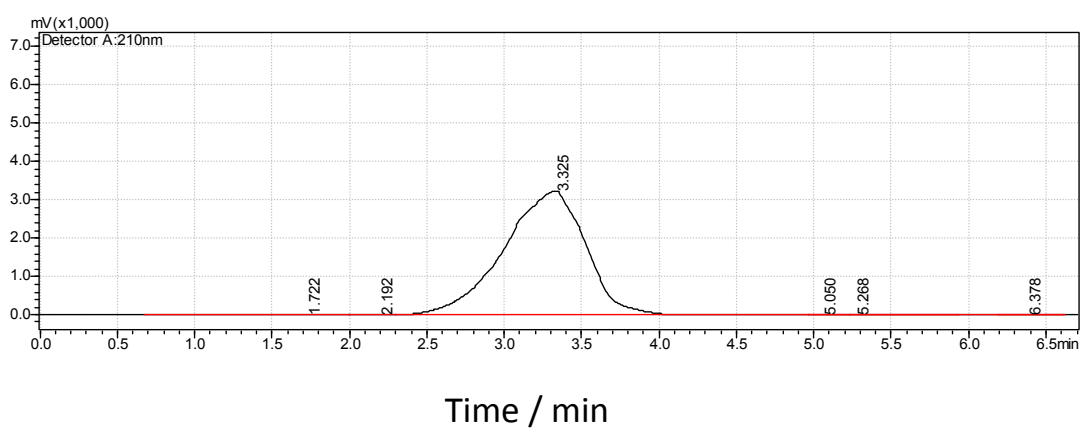

**Fig. S7** HPLC of acrylic acid standard sample

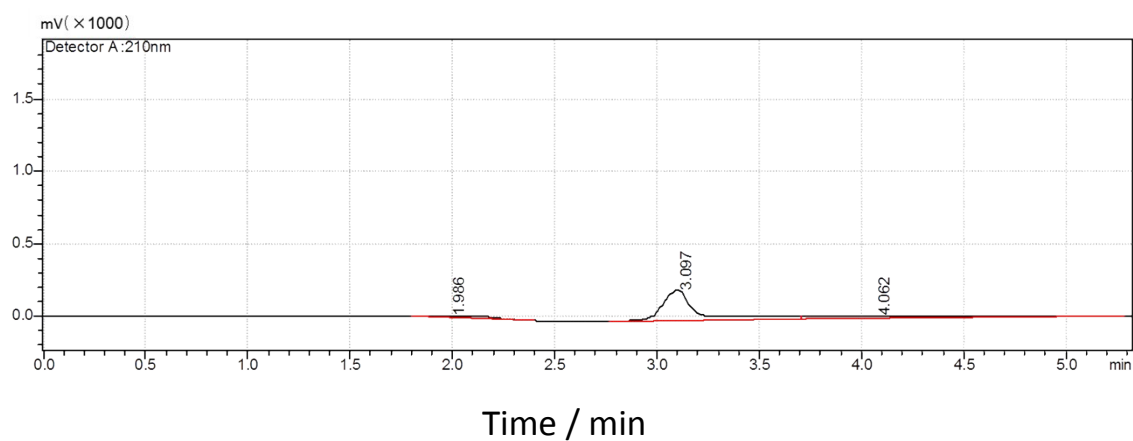

**Fig. S8** HPLC of HPAM degradation after 3.5h irradiation
